# Supplementary material for: The “Hub and Spoke” (HandS) ECMO for “Resuscitating” Neonates with Respiratory Life-Threatening Conditions
Source: MDPI journal article supplement (doi:10.3390/children8010024), 2021-01-05
Supplement: s1 [file s1]

Supplementary Table S1. "SPOKE" CENTER ECMO CHECKLIST

- **Order blood** for ECMO circuit priming and for emergency (2 adults packed RBCs) O
- **Provide a scrub nurse** O
- **Investigations to be made:**
  - Cranial ultrasound O
  - Echocardiogram O
  - Chest x-ray O
- **Recent lab tests:**
  - Hb, WBC, Platelets, CRP, PCT, Alb, ionized Ca, Cr, Urea, Bilirubine O
  - Lactate, APTT, prothrombin complex, Fibrinogen, D-dimer, Antithrombin O
  - Arterial blood gas O
  - Cardiac enzymes O
- **Patient preparation:**
  - CVC (leave neck access free, available for ECMO implant) O
  - Arterial -line O
  - Securely fixed endotracheal tube O
  - Indwelling catheter O
  - Space to set up the ECMO system and sterile instrument back table O
  - Height adjustable incubator with no mattress O

Metal utility cart ☐

IV pole on casters ☐

External defibrillator (neonatal) ☐

• Alert in advance the radiology technician to be available for x-ray after implant ☐

• Relatives/parents should be available to obtain full informed consent ☐

Supplementary Table S2. Pre-HandS demographic data form (for physisican)

- Hub Center\_\_\_\_\_ Spoke Center\_\_\_\_\_
- Pt demographic
- Name\_\_\_\_\_ DOB\_\_\_\_\_
- Gender\_\_\_\_\_ Contact \_\_\_\_\_
- Weight\_\_\_\_\_ Gestational Age\_\_\_\_\_
- Reason for HandS Transfer
- Prematurity
- Respiratory failure
- RDS
- MAS
- PNX
- CDH
- Apnea
- Bronchioltis
- Other\_\_\_\_\_
- Cardiac Failure
- Neurological disorder
- Surgical
- Other cause
- Level of severity of clinical conditions:
- Mild
- Moderate
- Severe

Supplementary Table S3. Pediatric HandS ECMO transfer form (for Pediatric ICU nurse)

| Parameter                    | At 1 <sup>st</sup> call | At SPOKE | During transfer | At HUB |
|------------------------------|-------------------------|----------|-----------------|--------|
| Cyanosis                     |                         |          |                 |        |
| Icterus                      |                         |          |                 |        |
| Paleness                     |                         |          |                 |        |
| RDS                          |                         |          |                 |        |
| Shock                        |                         |          |                 |        |
| epilepsy                     |                         |          |                 |        |
| Hypo/hyperactivity           |                         |          |                 |        |
| Urine output?                |                         |          |                 |        |
| Body Temperature (degrees C) |                         |          |                 |        |
| HR                           |                         |          |                 |        |
| RR                           |                         |          |                 |        |
| Transcutaneous SatO2         |                         |          |                 |        |
| PA                           |                         |          |                 |        |
| Htc %                        |                         |          |                 |        |
| pH                           |                         |          |                 |        |
| pO2                          |                         |          |                 |        |
| pCO2                         |                         |          |                 |        |
| HCO3                         |                         |          |                 |        |
| ABE                          |                         |          |                 |        |
| FiO2                         |                         |          |                 |        |
| Mechanical ventilation       |                         |          |                 |        |
| CPAP                         |                         |          |                 |        |
| Intubation AMBU vent         |                         |          |                 |        |
| Intubation mech Vent.        |                         |          |                 |        |
| PI/PEEP                      |                         |          |                 |        |
| RR (if mechanical vent)      |                         |          |                 |        |
| Tidal                        |                         |          |                 |        |
| CXR                          |                         |          |                 |        |

|                                                                         |  |  |  |  |
|-------------------------------------------------------------------------|--|--|--|--|
| Echocardiography                                                        |  |  |  |  |
| Cerebral US                                                             |  |  |  |  |
| Lines<br><div>Vein</div> <div>Umbelical artery</div> <div>NG tube</div> |  |  |  |  |
| Chest tube                                                              |  |  |  |  |
| Medication list                                                         |  |  |  |  |
| PGE1                                                                    |  |  |  |  |
| Surfactant done?                                                        |  |  |  |  |
| CPR ?                                                                   |  |  |  |  |

Supplementary Table S4. Pediatric HandS ECMO data form (for the pefusionist)

- Hub Center\_\_\_\_\_ Spoke Center\_\_\_\_\_
  
- Pt demographic
- First and Last Name\_\_\_\_\_
- DOB\_\_\_\_\_ Gestational Age\_\_\_\_\_
- Gender\_\_\_\_\_ BSA \_\_\_\_\_
- Weight\_\_\_\_\_ Height \_\_\_\_\_
  
- Reason for HandS Transfer: Diagnosis\_\_\_\_\_
- Prematurity
- Respiratory failure
- RDS
- MAS
- PNx
- CDH
- Apnea
- Bronchiolitis
- Other\_\_\_\_\_
- Cardiac Failure
- Neurological disorder
- Surgical
- Other cause
  
- ECMO details
- Pump type\_\_\_\_\_
- ECMO circuit type \_\_\_\_\_
- Oxygenator type \_\_\_\_\_

- Site of arterial cannulation \_\_\_\_\_
- Type of arterial cannula (size) \_\_\_\_\_
- Site of venous cannulation \_\_\_\_\_
- Type of venous cannula (size) \_\_\_\_\_
- Type of Priming \_\_\_\_\_
- Flow (l/min) \_\_\_\_\_
- Cannulation time(min) \_\_\_\_\_
- TAT (min) \_\_\_\_\_ EIT (min) \_\_\_\_\_

- Wean off? y/n \_\_\_\_\_ ECMO duration (days) \_\_\_\_\_
- Date of end ECMO \_\_\_\_\_
- Outcome: alive/dead
- Complications:
  - None
  - Hemorrhage/thrombosis
  - Cannula dislocation
  - Stroke
  - Infection
  - Change of ECMO: y/n
  - Other
